# Supplementary material
Source: publisher site journal article supplement (https://www.dovepress.com/article/356466)
Supplement: Supplementary file 1 [file get_supplementary_file.php]

**Supplementary Item 1.** Search terms used to complete systematic review

((("gastroesophageal reflux" OR "GERD" or "oesophageal reflux") OR ("Gastroesophageal Reflux"[Mesh])) AND (((((((("Life Style"[Mesh]) OR "Smoking Cessation"[Mesh]) AND "Diet"[Mesh]) OR "Weight Loss"[Mesh]) OR "Sleep"[Mesh]) OR "Stress, Psychological"[Mesh]) OR "Medication Adherence"[Mesh]) OR ("lifestyle"[Title/Abstract] OR "life style"[Title/Abstract] OR "smoking cessation"[Title/Abstract] OR "weight loss"[Title/Abstract] OR "diet"[Title/Abstract] OR "sleep"[Title/Abstract] OR "stress"[Title/Abstract] OR "medication"[Title/Abstract] OR "medication adherence"[Title/Abstract]))) AND (("patient adherence" OR "patient compliance" OR "patient nonadherence") OR ("Patient Compliance"[Mesh]))

1. lifestyle'/exp OR 'life style':ti,ab OR 'lifestyle':ti,ab OR 'smoking cessation'/exp OR 'abstination, smoking':ti,ab OR 'abstinence from nicotine':ti,ab OR 'abstinence from smoking':ti,ab OR 'abstinence from tobacco':ti,ab OR 'cessation, smoking':ti,ab OR 'dehabituation, smoking':ti,ab OR 'nicotine abstination':ti,ab OR 'nicotine abstinence':ti,ab OR 'nicotine cessation':ti,ab OR 'nicotine withdrawal':ti,ab OR 'quit smoking':ti,ab OR 'smoking abstinence':ti,ab OR 'smoking cessation':ti,ab OR 'smoking dehabituation':ti,ab OR 'smoking, stopping':ti,ab OR 'stop smoking':ti,ab OR 'stopping smoking':ti,ab OR 'tobacco use cessation':ti,ab OR 'body weight loss'/exp OR 'body weight decrease' OR 'body weight loss' OR 'body weight reduction' OR 'weight decrease' OR 'weight losing' OR 'weight loss' OR 'weight reducing' OR 'weight reduction' OR 'weight watching' OR 'diet'/exp OR 'diet':ti,ab OR 'diet regimen':ti,ab OR 'dieting':ti,ab)
2. (patient compliance'/exp OR 'adherence to therapy':ti,ab OR 'adherence to treatment':ti,ab OR 'compliance to therapy':ti,ab OR 'compliance to treatment':ti,ab OR 'patient adherence':ti,ab OR 'patient compliance':ti,ab OR 'patients` adherence':ti,ab OR 'therapy adherence':ti,ab OR 'therapy compliance':ti,ab OR 'treatment adherence':ti,ab OR 'treatment adherence and compliance':ti,ab OR 'treatment compliance':ti,ab)
3. (gastroesophageal reflux'/exp/mj OR 'gerd (gastroesophageal reflux disease)':ti,ab OR 'gerd (gastrooesophageal reflux disease)':ti,ab OR 'gord (gastrooesophageal reflux disease)':ti,ab OR 'cardioesophageal reflux':ti,ab OR 'cardiooesophageal reflux':ti,ab OR 'esophageal reflux':ti,ab OR 'esophageal regurgitation':ti,ab OR 'esophagogastric reflux':ti,ab OR 'esophagus reflux':ti,ab OR 'gastric regurgitation':ti,ab OR 'gastro esophageal reflux':ti,ab OR 'gastro oesophageal reflux':ti,ab OR 'gastroesophageal reflex':ti,ab OR 'gastroesophageal reflux':ti,ab OR 'gastroesophageal reflux disease':ti,ab OR 'gastroesophageal regurgitation':ti,ab OR 'gastroesophagus reflux':ti,ab OR 'gastrooesophageal reflex':ti,ab OR 'gastrooesophageal reflux':ti,ab OR 'gastrooesophageal reflux disease':ti,ab OR 'gastrooesophageal regurgitation':ti,ab OR 'oesophageal reflux':ti,ab OR 'oesophageal regurgitation':ti,ab OR 'oesophagogastric reflux':ti,ab OR 'oesophagus reflux':ti,ab OR 'reflux, gastroesophageal':ti,ab OR 'reflux, gastrooesophageal':ti,ab OR 'regurgitation, gastric':ti,ab OR 'regurgitation, gastroesophageal':ti,ab OR 'regurgitation, gastrooesophageal':ti,ab)
4. #1 AND #2 AND #3
